Corresponding author: Mitchell Lyons  
mitchell.lyons@unsw.edu.au  
UNSW Australia, Sydney, 2055

# Bird interactions with drones, from individuals to large colonies

Mitchell Lyons, Kate Brandis, Corey Callaghan,

Justin McCann, Charlotte Mills, Sharon Ryall and Richard Kingsford

*Centre for Ecosystem Science*

*School of Biological, Earth and Environmental Sciences*

*UNSW Australia, Sydney*

## Bird interactions with drones

### Abstract

Drones are rapidly becoming a key part of the toolkit for a range of scientific disciplines, as well as a range of management and commercial applications. This presents a number of challenges in context of how drone use might impact nearby wildlife. Interactions between birds and drones naturally come to mind, since they share the airspace. This paper details initial findings on the interactions between drones and birds for a range of waterbird, passerine and raptor species, across of a range of scientific applications and natural environments. The primary aims of this paper are to provide guidance for those planning or undertaking drone monitoring exercises, as well as provide direction for future research into safe and effective monitoring with drones. Our study sites we all located within Australia and spanned a range of arid, semi-arid, dunefield, floodplain, wetland, woodland, forest, coastal heath and urban environments. We particularly focus on behavioral changes towards drones during breeding season, interactions with raptors, and effects on nesting birds in large colonies – three areas yet to be explored in published literature. In over 70 hours of flight, there were no incidents with birds. Although some aggressive behavior was encountered from solitary breeding birds. Several large breeding bird colonies were surveyed, and included in our observations is monitoring and counting of nests in a colony of over 200,000 Straw-necked Ibis, the largest drone-based bird monitoring exercise to date. In addition to providing observations of interactions with specific bird species, we recommend procedures for flight planning, safe flying and avoidance. This paper also provides a basis for a number of critical and emerging areas of research into bird-drone interactions, most notably, territorial breeding birds, safety around large raptors, and the effect of drones on the behaviour of birds in large breeding colonies.

## Bird interactions with drones

*Keywords:* drones, UAV, UAS, birds, breeding, waterbirds, raptors, magpies

## Bird interactions with drones

### 1 Introduction

2 Unmanned aerial vehicles (hereafter drones), with their varied applications and general  
3 affordability, are increasingly used in ecological research and monitoring. Surveying birds  
4 from the air has many benefits (Kingsford and Porter, 2009). Use of drones in this context  
5 has a surprisingly long history (Abd-Elrahman et al., 2005; Chabot and Francis, 2016).  
6 Whilst application to avian research and management is relatively limited compared to  
7 other disciplines, it is gaining momentum. Current research spans a range of topics,  
8 including ethical guidelines (Vas et al., 2015), recreating environmental data input from  
9 bird flight paths (Rodríguez et al., 2012), monitoring nesting status (Weissensteiner et al.,  
10 2015), and both manual and automated detection routines for groups of birds and nest  
11 counts (Chabot and Bird, 2012; Chabot and Francis, 2016; Sardà-Palomera et al., 2012;  
12 Hodgson et al., 2016; Descamps et al., 2011; Trathan, 2004).

13 There are a range of challenges related to collection of data using drones, and a major  
14 component of this is interaction with nearby wildlife (Lambertucci et al., 2015). Naturally,  
15 birds are of great interest, given that they share the airspace. Research has only just begun  
16 in exploring these interactions (Vas et al., 2015), identifying a considerable knowledge  
17 gap in context of the diversity of bird species and how they interact with drones. In the  
18 context of drones, there is currently no literature on behavioral changes with breeding  
19 status, interactions with raptors, and effects on nesting birds in large colonies. Most  
20 parts of the world also have very little information about interactions with drones and  
21 local bird species. In this paper we provide some initial findings and guidelines to address  
22 some of these knowledge gaps. Drawing observations from over 70 hours of flight, we  
23 detail bird-drone interactions across a wide range of environments.

## Bird interactions with drones

24 We particularly focus on observations of birds during their breeding season, when nesting  
25 birds are more likely to be susceptible to disruption (Lambertucci et al., 2015). During  
26 the breeding season, drones can be particularly hazardous for the birds, given potential  
27 large congregations and territorial aggression. Of particular interest are our observations  
28 while monitoring several large breeding waterbird colonies; one colony contained at least  
29 100,000 nests. To date, the largest reported colony of birds monitored via a drone is a  
30 penguin colony of 11,000 (Trathan, 2004). We also report a number of interactions with  
31 raptors. Further to detailing the interactions with various bird species, we also provide  
32 some recommendations for safe flying and avoidance. This paper also provides the first  
33 comprehensive report of bird-drone interactions in Australia. The primary aim of this  
34 paper is to provide a basis for further research into bird-drone interactions, and to help  
35 readers in planning and safely executing monitoring work with the use of drones.

## 36 **Material and methods**

### 37 *Study locations and monitoring details*

38 Our study locations are within predominantly within eastern Australia but we focus on  
39 bird species that have a continental distribution (Fig. 1). The cluster of sites around  
40 Sydney were at various National Parks and urban greenspaces. The remaining sites were  
41 spread across a range of environments including arid and semi-arid floodplains, shrublands  
42 and dunefields, as well as permanent wetlands. Drone use spanned a range of survey  
43 planning and environmental monitoring activities. Table provides study site details,  
44 including the purpose of drone use and flight characteristics. Exact locations are not

## Bird interactions with drones

45 provided due to sensitivity for breeding birds, but are available from authors on request.  
46 Except for the Ibis colonies, bird observations were made incidental to normal drone  
47 operation activities. For the Ibis colonies, we conducted more systematic observations,  
48 which are detailed below. The main drone used for monitoring at all sites was a *DJI*  
49 *Phantom 3 Professional* quad-copter. Additionally, a *Sensefly eBee* fixed-wing and a *DJI*  
50 *S900* hexa-copter was also flown at some sites.

### 51 *General flight details*

52 The main purpose for drone use at most of the study sites was to acquire imagery to  
53 generate orthorectified mosaics and related 3D model products. This typically involved  
54 flying parallel flight lines at speeds between 5 to 10 m/s. To acquire sufficient image  
55 overlap for processing, flight lines were typically 20 to 100 m apart depending on flying  
56 height. For example, flying at 100 m above take off (ATO), flight lines were around 100 m  
57 apart, whereas at 20 m ATO, flight lines were around 20 m apart. As an example, one of  
58 the Lower Lachlan River surveys covered an approximately circular area of around 7 km<sup>2</sup>  
59 and we flew 34 individual flight transects at 100 m ATO. As most of the monitoring was in  
60 wet, muddy or dusty environments, the *DJI Phantom 3 Professional* was predominantly  
61 used, as it is relatively affordable. For example, the bird colonies were entirely under  
62 water, so failure or emergency landing would result in loss of the drone. Incidentally, all  
63 terrain vehicles provide a good platform for take off in a range of environments (Fig. 2).

## Bird interactions with drones

### 64 *Ibis breeding colonies*

65 The Ibis breeding colonies (Straw-necked Ibis *Threskiornis spinicollis*, Australian White  
66 Ibis *T. moluccus*, Glossy Ibis *Plegadis falcinellus*) presented a particularly challenging  
67 environment. One of the Lower Lachlan colonies had at least 200,000 adults (100,000  
68 nests) at the time of flying. The other colonies had between 10,000 - 50,000 adults. Ibis  
69 usually nest on inundated vegetation including lignum (*Duma florulenta*) and phragmites  
70 (*Phragmites australis*). Nests are typically between 20cm - 2m above ground level. At two  
71 of the colonies (Lower Lachlan and Lower Murrumbidgee), we conducted more systematic  
72 observations of the impact of the drone on Ibis behaviour, since they were active breeding  
73 events. This was in addition to capturing imagery over the entire colony. In order to ensure  
74 minimal impact, we monitored the effect of a drone on nesting adults, before conducting  
75 the full-colony monitoring exercise. Before any flights had been conducted with the drone,  
76 we entered the colony on an amphibious vehicle (*Argo 8x8 650*). After entering the colony,  
77 a random group of nests were chosen and a *GoPro Hero 5 Black* fixed to a 2.3 m pole was  
78 directed at the nests. We then moved (in the vehicle) approximately 50 m away and out of  
79 line of sight of the camera. We waited approximately 20 minutes to allow time for birds to  
80 return to their nests before launching the drone. After confirming safe flight parameters,  
81 the drone was elevated to 120 m above take off (ATO) and navigated to the nest site  
82 being filmed from the ground. The drone was slowly (approx. 1 m/s) descended to 20  
83 m ATO, and hovered for  $\tilde{2}$  minutes, and then descended to 10 m ATO. The landscape  
84 is flat, so height in meters ATO approximates height above the nests. The drone was  
85 raised and lowered multiple times at a speed of around 1 m/s to observe the height at  
86 which birds flushed from their nests, and under what conditions they returned. The drone  
87 was then flown back to the vehicle and we again waited 20 minutes before recovering the

## Bird interactions with drones

88 GoPro. The drone itself also captured video of the nest sites. Other studies (e.g., Vas  
89 et al. (2015)) performed multiple repeated experiments and while this is ideal from an  
90 experimental design perspective, we considered any additional disturbance to the birds  
91 unnecessary as the subsequent monitoring involved systematic flight lines over the entire  
92 colony.

### 93 *Animal welfare*

94 The ethics approvals we operated under covered the types of flight patterns for testing  
95 interaction with birds, so far as to obtain safe monitoring practices. The ethics requirements  
96 explicitly prohibited experimental designs that repeatedly induced interactions (e.g. (Vas  
97 et al., 2015)), as it was deemed to cause unnecessary potential risk. This is the primary  
98 reason for our relatively *ad hoc* observations.

## 99 **Results**

### 100 *Birds encountered*

101 We encountered a diverse group of bird species across many different environments; some  
102 of our sites were over 1500 km apart. In over 70 hours of flights, we had no strikes, nor  
103 did we encounter a situation where aggression posed a serious threat. Table details  
104 the main birds of interest that we considered might pose a risk at our various field  
105 sites. We also provide a list of all other birds observed at each site, that showed no  
106 noteworthy interactions with drone operation (Appendix A). Additionally, results from



## Bird interactions with drones

107 the Ibis colonies are provided in more detail below.

108 Of most concern in flight planning was the presence of raptors at many of our study  
109 sites. However, we did not encounter any negative interactions with raptors. Wedge-  
110 tailed Eagles (*Aquila audax*), Australia's largest bird of prey, were common at many of  
111 our study sites. At Sturt National Park and Strzelecki Reserve, they were present for  
112 the majority of flights, but were not observed to show interest the drone. They were also  
113 observed in Yantabulla but were not observed during flight. Black Kites (*Milvus migrans*)  
114 and Australian Kestrels (*Falco cenchroides*) were frequently observed at many of our sites  
115 outside of the Sydney basin. They appeared quite content to fly in close proximity to  
116 the drones, and continued normal activities. For example, while the drone was within 15  
117 meters of an Australian kestrel at one of the Lower Lachlan sites, the kestrel showed no  
118 behavioural changes and continued to hunt as normal, resulting in successful prey-capture.

119 We did observe at least one instance of a negative interaction with the drone, which was  
120 from an Australian Magpie (*Cracticus tibicen*) in the Sydney area. During their breeding  
121 season, on two occasions (August 2015 and October 2016), they flew aggressively towards  
122 the drone, although evasive action by the drone-operator, was effective. In contrast, Pied  
123 Currawongs (*Strepera graculina*) left their nests when approached by drones and displayed  
124 territorial calls, but not attempt to physically attack the drone. When Currawongs  
125 were similarly approached by other birds (i.e., Channel-billed Cuckoo (*Scythrops novaehollandiae*),  
126 Australian Raven (*Corvus coronoides*), Noisy Miner (*Manorina melanocephala*), and  
127 Common Myna (*Acridotheres tristis*), they displayed both audible and physical territorial  
128 behaviour. Moreover, during the non-breeding season, Australian magpies and pied  
129 currawongs showed little interest in the drone. Masked Lapwings (*Vanellus miles*) also

## Bird interactions with drones

130 displayed typical territorial calls, but did not demonstrate any aggressive actions towards  
131 drones - masked lapwings nest on open ground, thereby generally minimizing close proximity  
132 to the drone. Of minor note is the behaviour of small groups of passerines that were  
133 observed within the Sydney basin. Groups of noisy miners and common mynas at times  
134 appeared as though they were being aggressive (similar to behavior when a raptor is  
135 overhead), but were never observed to strike or attack the drone. Additionally, groups of  
136 Welcome Swallows (*Hirundo neoxena*), fairy martins (*Petrochelidon ariel*), and European  
137 Starlings (*Sturnus vulgaris*) often flew extremely close (i.e., <1 m) to the drone. On  
138 several occasions, swarms of insects were attracted to the multi-rotor drones, though we  
139 were uncertain whether these insectivores were attracted to the insects.

140

### 141 *Ibis colonies*

142 Ibis colonies are areas with high densities of nests and birds, meaning adult Ibis were  
143 always in close proximity to the drone. This was also true at higher flight altitudes,  
144 as Ibis were observed flying in thermals that stretched many 100's of meters into the  
145 air. Manual counting of individual nests from the processed drone imagery at one of the  
146 Lower Lachlan sites indicated that there were 101,360 nests. Notwithstanding the error  
147 associated with that value, which is yet to be fully quantified, it is nonetheless a daunting  
148 thought when considering a drone flying operation. We provide (annotated) video of  
149 the filmed nest site (<https://youtu.be/86cgvCCcNto>) and we provide a brief summary  
150 here. At the Lower Lachlan site, Ibis directly below the drone flushed from their nest  
151 when the drone descended to about 20 m. Ibis on adjacent nests ( 10 to 15 m away)

## Bird interactions with drones

152 displayed vigilant behavior but did not flush (Fig. 3). If the drone was left hovering  
153 at a height of 15 m or greater, birds would return to their nest within 30 seconds to a  
154 minute. If the drone was left hovering at 10 m, birds did not return to their nest within  
155 5 minutes, the maximum time we allowed in order to minimise disturbance to chicks and  
156 eggs. The flush of birds caused by retrieving the camera (i.e., walking into the colony)  
157 was at least 3 to 4 times larger (in number of birds) than that caused by the drone  
158 (Fig. 3 and <https://youtu.be/86cgvCCcNto>). Results were almost identical at the Lower  
159 Murrumbidgee site, except that birds tended not to flush until the drone descended to  
160 between 10-15 m. Ibis occasionally flew quite close to the drone, if they did not see it  
161 when changing direction, although they quite easily avoided it. We provide a video of  
162 such an avoidance (<https://youtu.be/RQGYJig5-1M>).

163

## 164 Discussion

165 Overall, we tended to observe reactions consistent with those reported (or implied) from  
166 various drone monitoring studies focused on waterbirds and passerines (Chabot et al.,  
167 2015; Descamps et al., 2011; Hodgson et al., 2016; Sardà-Palomera et al., 2012; Vas  
168 et al., 2015). Considering this, we think it reasonable that most of the non-territorial  
169 birds in Australia are relatively low risk to fly over. We encountered several birds that  
170 can be highly territorial and aggressive during breeding season, but only the Australian  
171 Magpie showed truly aggressive action towards the drone. Magpies, and to a lesser extent  
172 Currawongs and Lapwings, are colloquially bold and will readily harass and strike other  
173 birds and people. When Magpies presented a threat we found that an evasive action of

## Bird interactions with drones

174 flying full speed away, angled upwards, was sufficient to avoid contact. Magpies retreated  
175 as per their normal behaviour once the drone was 50-100 m away. Operators should thus  
176 always be aware of the breeding season for birds in their study area. There is no existing  
177 literature on interactions between drones and raptors, so our findings here provide a  
178 basis for further study. Anecdotal evidence suggests that Wedge-tailed Eagles are serious  
179 threats to drones, although we did not experience any negative interactions. In fact, none  
180 of the raptors present at our sites appeared to be interested in the drones. Large raptors  
181 (Wedge-tailed Eagles particularly) tend to be more active in higher winds or during parts  
182 of the day where thermals have developed. We avoided those conditions in general, so  
183 that may have contributed to the lack of interest shown, and we would certainly encourage  
184 others to follow similar guidelines. If a large raptor is observed, we would still recommend  
185 safely landing the drone. If a raptor surprises an operator, there is little that can be done  
186 except evasive action to land the drone as quickly and safely as possible.

187

188 Whilst our work was not systematically designed to test interactions, we show that  
189 relatively affordable drones have the capacity for monitoring very large groups of birds,  
190 and we feel that maintaining safe flight parameters with relatively low disturbance levels  
191 is quite achievable. As far as we know, the Ibis colony at the Lower Lachlan River is  
192 the largest bird colony to date to have counts derived from drone imagery. Chabot et al.  
193 (2015); Hodgson et al. (2016); Trathan (2004); Descamps et al. (2011) detail monitoring  
194 of groups of birds in the order of several thousand to around 11,000. Our work in the  
195 Ibis colonies is detailed here to the extent that we think will be useful for others to  
196 plan and attempt similar use of drones over large colonies. Further analysis, in context  
197 of bird behavior, counting strategies and accuracy, and colony monitoring success, is

## Bird interactions with drones

198 warranted (Brandis et al., prep). That work will also compare disturbance between  
199 drones and traditional monitoring methods, that is, on-foot, canoes, amphibious vehicles  
200 and aerial survey. Another major focus for future research is automated processing of  
201 the drone imagery products. At present, nest and bird numbers have been manually  
202 counted from the imagery, but current research (Lyons et al., prep) is underway that is  
203 focusing on automated machine learning and statistical methods. Most current literature  
204 is focused on counting bird numbers (Chabot and Francis, 2016), as opposed to counting  
205 bird nests, which is often the primary focus for monitoring, particularly in waterbird  
206 breeding colonies.

207 One important aspect we did not measure during our work was the impact of sound. In  
208 relatively quiet areas, drones are reasonably noisy, and can be heard 200-300 m away. We  
209 are unsure of the impact this is likely to have, and it is likely that the existing literature  
210 on the impact of noise on wildlife will turn its attention to drones. Incidentally, while  
211 working in the bird colonies, the background noise of the colony was such that the drone  
212 was inaudible, to humans, once it was more than 30-40 m away.

213 In conclusion, we provide considerations to those planning drone monitoring exercises  
214 where bird interactions are likely, or where guidance on potential interactions is sought.  
215 Firstly, consider carefully the birds likely to be present, if they are territorial, and if they  
216 are in breeding season. Start flights by first ascending to a reasonable altitude, as most  
217 interactions will occur close to the ground. Raptors are still a risk at higher altitudes,  
218 but avoiding the environmental conditions discussed above and having an evasive landing  
219 procedure will mitigate that risk. After assessing the area flying at high altitude, lower  
220 the drone slowly to obtain an idea of when interactions begin to occur. Needless to say,

## Bird interactions with drones

221 spotters are invaluable. Although it may seem obvious once stated, there is no need to  
222 try and avoid flying birds - they are highly skilled (generally) at avoiding birds in flight.  
223 See the video link to ibis avoiding the drone in flight. Additionally, multi-rotor drones  
224 are able to come to a complete stop mid-air very quickly; birds typically do not do this,  
225 so we recommend avoiding this procedure when operating in close proximity to flying  
226 birds. We found that birds tended to become more vigilant or alarmed when the drone  
227 was in stationary flight. If a collision is anticipated, then a reduction of pace and change  
228 of course are suitable options. This paper adds to the growing literature that highlights  
229 the potential of drones for avian research, as well as providing a basis for critical future  
230 research to ensure safe and effective monitoring.

## 231 **Acknowledgments**

232 Financial and logistical support from research grants (UNSW grant PS40727 to ML,  
233 ARC grant LP150100972), the Commonwealth Environmental Water Office, the New  
234 South Wales Office of Environment and Heritage, Bush Heritage Australia, Arid Recovery  
235 Reserve and local land owners. We operated under two animal ethics approvals from the  
236 University of New South Wales Animal Care and Ethics committee (approval numbers  
237 16/3B and 16/131B).

## 238 **Conflicts of Interest**

239 No conflicts of interest declared.

## Bird interactions with drones

### 240 **References**

- 241 Abd-Elrahman, A., Pearlstine, L., and Percival, F. (2005). Development of pattern  
242 recognition algorithm for automatic bird detection from unmanned aerial vehicle  
243 imagery. *Surveying and Land Information Science*, 65(1):37.
- 244 Brandis, K., Lyons, M., Callaghan, C., McCann, J., Ryall, S., and Kingsford, R. (in prep).  
245 Monitoring very large breeding bird colonies with drones. *Manuscript in preparation*.
- 246 Chabot, D. and Bird, D. M. (2012). Evaluation of an off-the-shelf unmanned aircraft  
247 system for surveying flocks of geese. *Waterbirds*, 35(1):170–174.
- 248 Chabot, D., Craik, S. R., and Bird, D. M. (2015). Population census of a large common  
249 tern colony with a small unmanned aircraft. *PloS one*, 10(4):e0122588.
- 250 Chabot, D. and Francis, C. M. (2016). Computer-automated bird detection and counts  
251 in high-resolution aerial images: a review. *Journal of Field Ornithology*.
- 252 Descamps, S., Béchet, A., Descombes, X., Arnaud, A., and Zerubia, J. (2011). An  
253 automatic counter for aerial images of aggregations of large birds. *Bird study*, 58(3):302–  
254 308.
- 255 Hodgson, J. C., Baylis, S. M., Mott, R., Herrod, A., and Clarke, R. H. (2016). Precision  
256 wildlife monitoring using unmanned aerial vehicles. *Scientific reports*, 6.
- 257 Kingsford, R. and Porter, J. (2009). Monitoring waterbird populations with aerial  
258 surveys—what have we learnt? *Wildlife Research*, 36(1):29–40.
- 259 Lambertucci, S. A., Shepard, E. L., and Wilson, R. P. (2015). Human-wildlife conflicts  
260 in a crowded airspace. *Science*, 348(6234):502–504.

## Bird interactions with drones

- 261 Lyons, M., Murray, N., and Wilshire, J. (in prep). Automated processing of drone data  
262 over a very large bird colony. *Manuscript in preparation*.
- 263 Rodríguez, A., Negro, J. J., Mulero, M., Rodríguez, C., Hernández-Pliego, J., and  
264 Bustamante, J. (2012). The eye in the sky: combined use of unmanned aerial systems  
265 and gps data loggers for ecological research and conservation of small birds. *PLoS One*,  
266 7(12):e50336.
- 267 Sardà-Palomera, F., Bota, G., Vinolo, C., Pallares, O., Sazatornil, V., Brotons, L.,  
268 Gomariz, S., and Sarda, F. (2012). Fine-scale bird monitoring from light unmanned  
269 aircraft systems. *Ibis*, 154(1):177–183.
- 270 Trathan, P. N. (2004). Image analysis of color aerial photography to estimate penguin  
271 population size. *Wildlife Society Bulletin*, 32(2):332–343.
- 272 Vas, E., Lescroël, A., Duriez, O., Boguszewski, G., and Grémillet, D. (2015).  
273 Approaching birds with drones: first experiments and ethical guidelines. *Biology letters*,  
274 11(2):20140754.
- 275 Weissensteiner, M. H., Poelstra, J. W., and Wolf, J. B. (2015). Low-budget ready-to-fly  
276 unmanned aerial vehicles: An effective tool for evaluating the nesting status of canopy-  
277 breeding bird species. *Journal of Avian Biology*, 46(4):425–430.



## Bird interactions with drones

Table 1: Study site information. All flight heights are above take off (ATO).

| Location                      | Date/s   | Purpose and flight characteristics                                                                                                                                                                                               |
|-------------------------------|----------|----------------------------------------------------------------------------------------------------------------------------------------------------------------------------------------------------------------------------------|
| Lower Lachlan River, NSW      | Oct 2016 | Monitoring two straw-necked ibis breeding colonies (extent, number of nests, vegetation characteristics). Systematic observations (detailed below). Perpendicular flight lines at 100 m and 60 m. Quad-copter. 8 hours of flight |
| Lower Murrumbidgee River, NSW | Nov 2016 | Monitoring straw-necked ibis breeding colony (extent, number of nests, vegetation characteristics). Systematic observations (detailed below). Perpendicular flight lines at 100 m. Quad-copter. 3 hours of flight                |
| Macquarie Marshes, NSW        | Nov 2016 | Monitoring two straw-necked ibis breeding colonies (extent, number of nests, vegetation characteristics). Perpendicular flight lines at 100 m. Quad-copter. 5 hours of flight                                                    |
| Barmah-Millewa forest, NSW    | Dec 2016 | Monitoring straw-necked ibis breeding colony (extent, number of nests, vegetation characteristics). Perpendicular flight lines at 100 m and 60 m. Quad-copter. 4 hours of flight                                                 |

## Bird interactions with drones

Table 1: Study site information. All flight heights are above take off (ATO).

| Location                                        | Date/s                 | Purpose and flight characteristics                                                                                                                                                                                                                                                                                                                          |
|-------------------------------------------------|------------------------|-------------------------------------------------------------------------------------------------------------------------------------------------------------------------------------------------------------------------------------------------------------------------------------------------------------------------------------------------------------|
| Yantabulla<br>Floodplain,<br>NSW                | 2015-2016              | Digital elevation model generation of floodplain; perpendicular flight lines at 120 m. Monitoring great egret, intermediate egret, royal spoonbill and Australian white ibis breeding (extent, number of nests). Perpendicular flight lines at 100 m. Vegetation survey; perpendicular flight lines at 10 m. Quad-copter and fixed-wing. 14 hours of flight |
| Sturt NP,<br>NSW &<br>Strzelecki<br>Reserve, SA | June 2016              | Vegetation monitoring, dune mapping and site selection planning. Perpendicular flight lines and sporadic flight paths between 10 and 100 m. Quad-copter. 8 hours of flight                                                                                                                                                                                  |
| Roxby<br>Downs,<br>SA                           | April &<br>August 2016 | Vegetation monitoring. Sporadic flight paths between 10 and 100 m. Quad-copter. 5 hours of flight                                                                                                                                                                                                                                                           |
| Sydney Basin                                    | 2015-2016              | Post-fire disturbance and vegetation monitoring. Perpendicular flights lines at 100 m; circular flights path at 10, 15, 40, 60 m at several sites. Quad-copter, hexa-copter and fixed-wing. 14 hours of flight                                                                                                                                              |

## Bird interactions with drones

Table 1: Study site information. All flight heights are above take off (ATO).

---

| <b>Location</b> | <b>Date/s</b> | <b>Purpose and flight characteristics</b>                                                                                                                                                                                            |
|-----------------|---------------|--------------------------------------------------------------------------------------------------------------------------------------------------------------------------------------------------------------------------------------|
| Sydney city     | 2015-2016     | Training and green space monitoring. Perpendicular flight lines at various altitudes; repeated take-off/landing procedures; sporadic flights paths at various altitudes. Quad-copter, hexa-copter and fixed-wing. 11 hours of flight |

---

## Bird interactions with drones

Table 2: Key bird species interactions with drones.

| Bird(s)                                                            | Sites present                                           | Interactions of note                                                                                           |
|--------------------------------------------------------------------|---------------------------------------------------------|----------------------------------------------------------------------------------------------------------------|
| Ibis                                                               | Lower Lachlan, Lower Murrumbidgee, Millewa, and Marshes | Present in large numbers, but showed little interest or aversion to drones, except when approached within 10 m |
| Australian Magpie                                                  | Coastal and central NSW sites                           | Aggressive towards drone in breeding season                                                                    |
| Pied Currawong, Masked Lapwing                                     | Coastal and central NSW sites                           | Abundant and active during breeding season, but not aggressive towards drone                                   |
| Wedge-tailed Eagle, Black Kite, Whistling Kite, Australian Kestrel | All sites outside Sydney Basin                          | Observed to be present during many flights, but largely uninterested in drones                                 |
| Waterbirds (ducks, piscivores and waders)                          | Yantabulla. Non-desert sites outside Sydney Basin       | Birds showed no obvious aversion, but tended not to take flight while drone present                            |

## Bird interactions with drones

Table 2: Key bird species interactions with drones.

| <b>Bird(s)</b>                     | <b>Sites present</b> | <b>Interactions of note</b>                                                                                             |
|------------------------------------|----------------------|-------------------------------------------------------------------------------------------------------------------------|
| Noisy Miners,<br>Indian Mynas      | Sydney Basin sites   | At times appear to display aggressive behaviour in close proximity to the drone, but never struck or attacked the drone |
| Swallows,<br>Martins,<br>Starlings | Sydney Basin sites   | Groups fly extremely close the drone, but no aggression or contact was observed                                         |

## Bird interactions with drones

### 278 **Figure legends**

279

280 Figure 1: Map showing study locations for this paper. BM = Barmah-Millewa; LL =  
281 Lower Lachlan; LM = Lower Murrumbidgee; MM = Macquarie Marshes; RD = Roxby  
282 Downs; SS = Sturt and Strzelecki; SY = Sydney Basin/City. See Table for more details.

283

284 Figure 2: Quad-copter (*DJI Phantom 3 Pro*) launch from an amphibious vehicle (*Argo*  
285 *8x8 650*) at a straw-necked ibis colony on the Lower Lachlan River in New South Wales,  
286 Australia.

287

288 Figure 3: Images of a group of Straw-necked Ibis nests at the Lower Lachlan River  
289 in New South Wales, Australia. The nests shown are approximately 15 m away from  
290 another group of nests over which a quad-copter drone was being flown. a) shows a typical  
291 state pre-disturbance of any kind; b) vigilant behaviour when the drone was lowered to  
292 approximately 20 m above the adjacent nests, some birds from the adjacent nests flush; c)  
293 more highly vigilant behaviour when the drone was lowered to approximately 10 m above  
294 the adjacent nests; d) birds flushed from nest as the camera was retrieved on foot.

295

## Bird interactions with drones

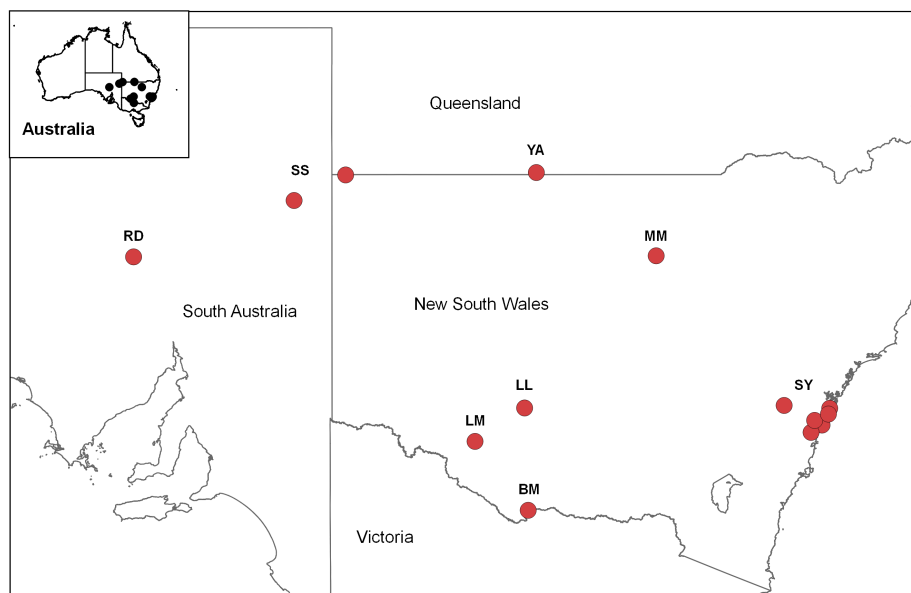

Figure 1: Map showing study locations for this paper. BM = Barmah-Millewa; LL = Lower Lachlan; LM = Lower Murrumbidgee; MM = Macquarie Marshes; RD = Roxby Downs; SS = Sturt and Strzelecki; SY = Sydney Basin/City. See Table for more details.

## Bird interactions with drones

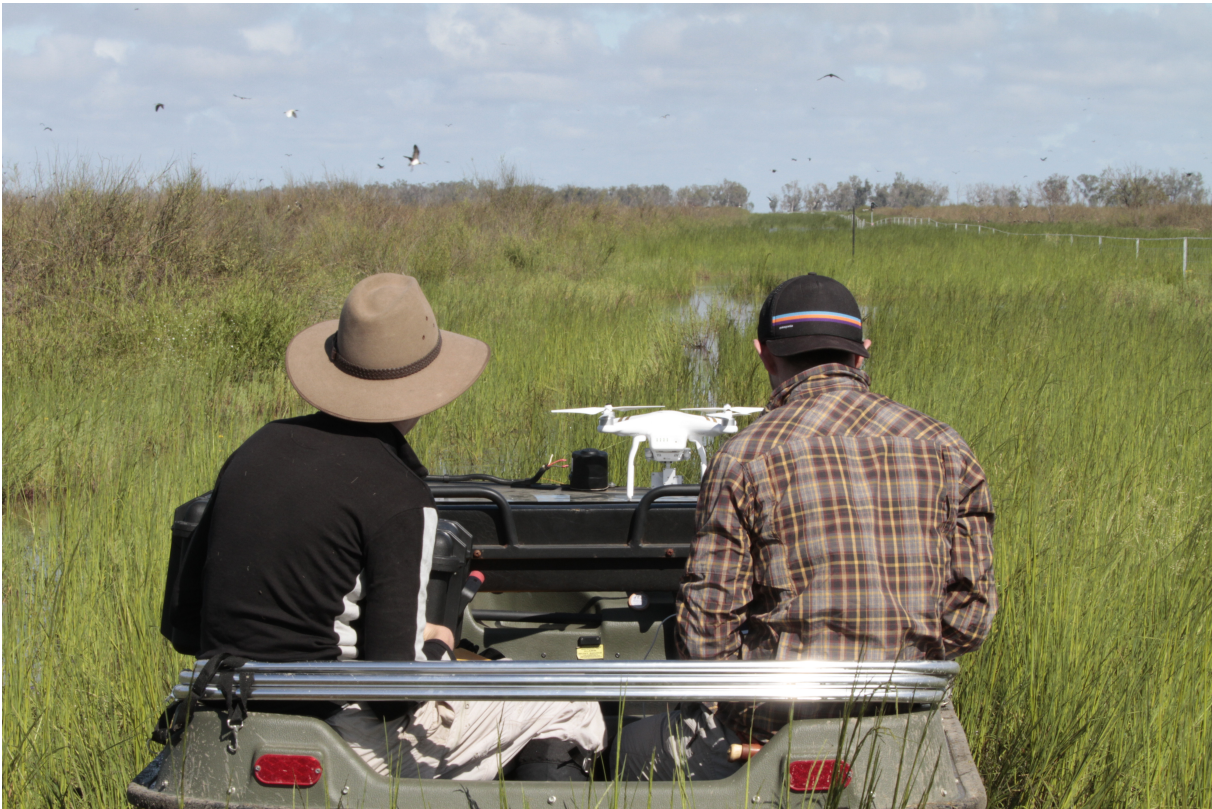

Figure 2: Quad-copter (*DJI Phantom 3 Pro*) launch from an amphibious vehicle (*Argo 8x8 650*) at a straw-necked ibis colony on the Lower Lachlan River in New South Wales, Australia.



## Bird interactions with drones

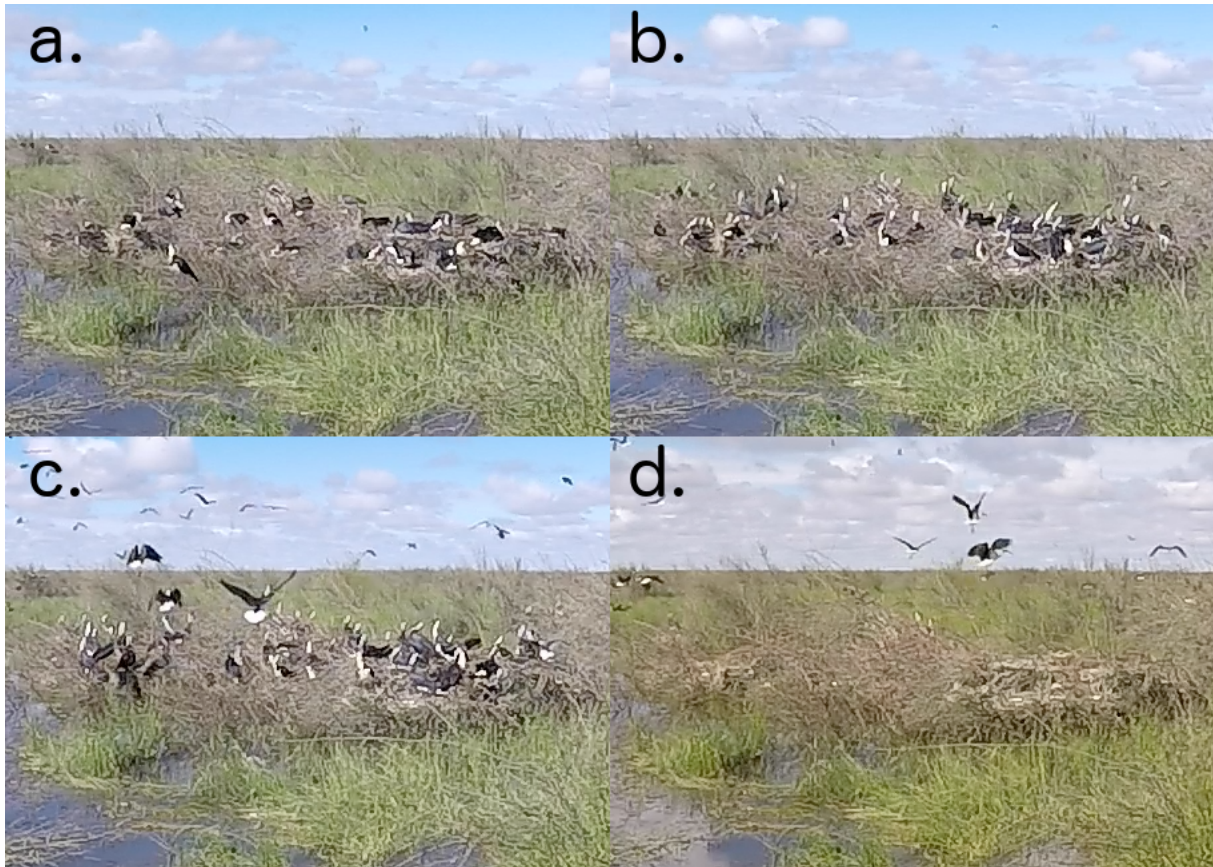

Figure 3: Images of a group of Straw-necked Ibis nests at the Lower Lachlan River in New South Wales, Australia. The nests shown are approximately 15 m away from another group of nests over which a quad-copter drone was being flown. a) shows a typical state pre-disturbance of any kind; b) vigilant behaviour when the drone was lowered to approximately 20 m above the adjacent nests, some birds from the adjacent nests flush; c) more highly vigilant behaviour when the drone was lowered to approximately 10 m above the adjacent nests; d) birds flushed from nest as the camera was retrieved on foot.

## Bird interactions with drones

### 296 Appendix A

297 This appendix provides a list of birds observed at each study location during drone flying  
298 operations, that are not directly discussed (or are mentioned in their broader taxonomic  
299 group) in the main text and showed no notable interaction with the drones. Some  
300 study sites were relatively small, or had more limited survey, meaning less birds were  
301 observed. Section and Table in the main text provides further information about the  
302 study locations.

#### 303 *Lower Lachlan River:*

304 Plumed Whistling-Duck, Black Swan, Pacific Black Duck, Grey Teal, Pink-eared Duck,  
305 Hardhead, Hoary-headed Grebe, Little Pied Cormorant, Australian Pelican, Great Egret,  
306 Glossy Ibis, Australian White Ibis, Royal Spoonbill, Swamp Harrier, Black Kite, Whistling  
307 Kite, Australasian Swamphen, Eurasian Coot, Pied Stilt, Whiskered Tern, Crested Pigeon,  
308 Galah, Superb Fairywren, Magpie-lark, Australian Reed-Warbler, Little Grassbird

#### 309 *Lower Murrumbidgee River:*

310 No additional birds observed

#### 311 *Macquarie Marshes:*

312 Royal Spoonbill

## Bird interactions with drones

### 313 *Barmah-Millewa Forest:*

314 Royal Spoonbill, Great Egret, White-faced Heron, Musk Duck, Australasian Swamphen

### 315 *Yantabulla Floodplain:*

316 Great Egret, Intermediate Egret, Australian White Ibis, Yellow-billed Spoonbill, Royal

317 Spoonbill, Australian Pelican, Australian Wood Duck, Pacific Black Duck, Grey Teal,

318 Pink-eared Duck, Little Pied Cormorant, Australasian Darter, White-necked Heron, White-

319 faced Heron, Eurasian Coot, Pied Stilt, Black-fronted Dotterel, Peaceful Dove, Sacred

320 Kingfisher, Cockatiel, White-plumed Honeyeater, Willie Wagtail, Magpie-lark

### 321 *Sturt National Park and Strzelecki Reserve:*

322 White-winged Fairy-wren, Masked Woodswallow, Singing Honeyeater, Black-faced Woodswallow,

323 Zebra Finch, Cinnamon Quail-Thrush, Chirruping Wedgebill

### 324 *Roxby Downs:*

325 Black-faced Woodswallow, Crested Pigeon, Little Raven, Zebra Finch

## Bird interactions with drones

326 *Sydney Basin:*

- 327 Yellow-faced Honeyeater, Eastern Spinebill, Red Wattlebird, Noisy Friarbird, New Holland  
328 Honeyeater, Gray Butcherbird, Maned Duck, Pacific Black Duck

329 *Sydney City:*

- 330 Rainbow Lorikeet, Black-faced Cuckooshrike, Common Koel, Little Corella, Sulphur-  
331 crested Cockatoo, Galah, Gray Butcherbird
